# Supplementary material for: Utilisation of primary care before a childhood cancer diagnosis: do socioeconomic factors matter?: A Danish nationwide population-based matched cohort study
Source: PubMed Central journal article supplement — BMJ Open. 2018 Aug 17;8(8):e023569. doi: 10.1136/bmjopen-2018-023569 (PMC6104784; doi:10.1136/bmjopen-2018-023569), 2018-08-17
Supplement: bmjopen-2018-023569supp001.pdf [file bmjopen-2018-023569supp001.pdf]

**Supplementary Table 1a. Additional consultation rates and absolute difference in general practice in the 1-12 months before diagnosis by household socioeconomic factors and three-month intervals**

|                                     | 1-3 months                    |                         | 4-6 months                    |                         | 7-9 months                    |                     | 10-12 months                  |                     |
|-------------------------------------|-------------------------------|-------------------------|-------------------------------|-------------------------|-------------------------------|---------------------|-------------------------------|---------------------|
|                                     | Additional consultation rates | Absolute difference     | Additional consultation rates | Absolute difference     | Additional consultation rates | Absolute difference | Additional consultation rates | Absolute difference |
| <b>All</b>                          | 1.67 (1.55:1.88)              | -                       | 0.20 (0.12:0.28)              | -                       | 0.18 (0.09:0.27)              | -                   | 0.12 (0.04: 0.20)             | -                   |
| <b>Parental cohabitation status</b> |                               |                         |                               |                         |                               |                     |                               |                     |
| <b>Living with a partner</b>        | 1.81 (1.61:2.01)              | Ref                     | 0.19 (0.08:0.29)              | Ref                     | 0.19 (0.07:0.29)              | Ref                 | 0.11 (0.01:0.21)              | Ref                 |
| <b>Living alone</b>                 | 1.64 (1.42:1.87)              | -0.17 (-0.45:0.10)      | 0.26 (0.01:0.41)              | 0.07 (-0.12:0.26)       | 0.20 (0.04:0.37)              | 0.01 (-0.18:0.22)   | 0.17 (-0.00:0.35)             | 0.06 (-0.14:0.27)   |
| <b>Siblings</b>                     |                               |                         |                               |                         |                               |                     |                               |                     |
| <b>No</b>                           | 1.53 (1.24:1.81)              | Ref                     | 0.17 (-0.05:0.39)             | Ref                     | 0.19 (-0.06:0.44)             | Ref                 | 0.08 (-0.14:0.29)             | Ref                 |
| <b>Yes</b>                          | 1.89 (1.68:1.96)              | 0.29 (-0.02:0.61)       | 0.23 (0.13:0.32)              | 0.05 (-0.19:0.29)       | 0.19 (0.09:0.28)              | 0.00 (-0.27:0.27)   | 0.14 (0.05:0.24)              | 0.06 (-0.17:0.31)   |
| <b>Labour market affiliation</b>    |                               |                         |                               |                         |                               |                     |                               |                     |
| <b>Employed</b>                     | 1.74 (0.60:1.89)              | Ref                     | 0.14 (0.05:0.23)              | Ref                     | 0.18 (0.08:0.28)              | Ref                 | 0.12 (0.02:0.21)              | Ref                 |
| <b>Mixed</b>                        | 1.82 (1.46:2.18)              | 0.08 (-0.31:0.47)       | 0.44 (0.16:0.71)              | 0.30 (-0.01:0.60)       | 0.08 (-0.18:0.24)             | -0.10 (-0.38:0.18)  | 0.21 (-0.02:0.43)             | 0.09 (-0.15:0.34)   |
| <b>Unemployed</b>                   | 1.85 (1.45:2.25)              | 0.11 (-0.32:0.53)       | 0.43 (0.12:0.75)              | 0.29 (-0.04:0.62)       | 0.46 (0.07:0.85)              | 0.28 (-0.11:0.68)   | 0.13 (-0.19:0.46)             | 0.01 (-0.32:0.35)   |
| <b>Educational level</b>            |                               |                         |                               |                         |                               |                     |                               |                     |
| <b>High</b>                         | 1.61 (1.43:1.80)              | Ref                     | 0.12 (-0.01:0.24)             | Ref                     | 0.21 (0.07:0.36)              | Ref                 | 0.14 (0.01:0.27)              | Ref                 |
| <b>Medium</b>                       | 1.91 (1.70:2.12)              | <b>0.30 (0.04:0.57)</b> | 0.29 (0.15:0.42)              | 0.17 (-0.02:0.35)       | 0.15 (0.02: 0.29)             | -0.06 (-0.25:0.14)  | 0.16 (0.01:0.27)              | 0.02 (-0.18:0.20)   |
| <b>Low</b>                          | 1.83 (1.52:2.15)              | 0.22 (-0.15:0.58)       | 0.31 (0.06:0.56)              | 0.19 (-0.08:0.47)       | 0.18 (-0.06:0.41)             | -0.03 (-0.31:0.24)  | 0.04 (-0.18:0.26)             | -0.10 (-0.36:0.15)  |
| <b>Income</b>                       |                               |                         |                               |                         |                               |                     |                               |                     |
| <b>High</b>                         | 1.46 (1.23:1.69)              | Ref                     | 0.10 (-0.06:0.26)             | Ref                     | 0.24 (0.07:0.41)              | Ref                 | 0.07 (-0.08:0.21)             | Ref                 |
| <b>Medium</b>                       | 1.86 (1.67:2.05)              | <b>0.40 (0.10:0.70)</b> | 0.17 (0.05:0.28)              | 0.07 (-0.13:0.26)       | 0.16 (0.36:0.29)              | -0.08 (-0.29:0.14)  | 0.17 (0.04:0.30)              | 0.10 (-0.09:0.29)   |
| <b>Low</b>                          | 1.85 (1.60:2.11)              | <b>0.39 (0.05:0.74)</b> | 0.40 (0.19:0.60)              | <b>0.30 (0.04:0.55)</b> | 0.18 (-0.01:0.38)             | -0.06 (-0.32:0.20)  | 0.10 (-0.07:0.28)             | 0.03 (-0.19:0.26)   |

Additional consultation rates defined as the difference between the cancer cohort and the reference cohort.  
 Absolute difference in additional consultation rates compared to the reference group.

Statistically significant absolute differences are shown in bold type.

**Supplementary Table 1b. Additional consultation rates and absolute difference in general practice in the 13-24 months before diagnosis by household socioeconomic factors and three-month intervals**

|                                     | 13-15 months                  |                     | 16-18 months                  |                     | 19-21 months                  |                     | 22-24 months                  |                     |
|-------------------------------------|-------------------------------|---------------------|-------------------------------|---------------------|-------------------------------|---------------------|-------------------------------|---------------------|
|                                     | Additional consultation rates | Absolute difference |
| <b>All</b>                          | 0.10 (0.02:0.18)              | -                   | 0.11 (0.03:0.19)              | -                   | 0.05 (-0.03:0.13)             |                     | -0.00 (-0.08:0.07)            | -                   |
| <b>Parental cohabitation status</b> |                               |                     |                               |                     |                               |                     |                               |                     |
| <b>Living with a partner</b>        | 0.08 (-0.02:0.18)             | Ref                 | 0.08 (-0.01:0.17)             | Ref                 | 0.06 (-0.05:0.16)             | Ref                 | -0.06 (-0.14:0.04)            | Ref                 |
| <b>Living alone</b>                 | 0.18 (0.00:0.35)              | 0.09 (-0.11:0.29)   | 0.21 (0.04:0.38)              | 0.13 (-0.06:0.32)   | 0.04 (-0.01:0.19)             | -0.02 (-0.02:0.16)  | 0.11 (-0.04:0.25)             | 0.15 (-0.02:0.32)   |
| <b>Siblings</b>                     |                               |                     |                               |                     |                               |                     |                               |                     |
| <b>No</b>                           | -0.10 (-0.29:0.09)            | Ref                 | -0.04 (-0.21:-0.00)           | Ref                 | -0.06 (-0.26:0.14)            | Ref                 | -0.19 (-0.36:0.03)            | Ref                 |
| <b>Yes</b>                          | 0.16 (0.07:0.26)              | 0.26 (-0.05:0.48)   | 0.16 (0.07:0.25)              | 0.20 (-0.01:0.41)   | 0.09 (-0.01:0.18)             | 0.14 (-0.08:0.37)   | 0.04 (-0.04:0.14)             | 0.24 (-0.06:0.43)   |
| <b>Labour market affiliation</b>    |                               |                     |                               |                     |                               |                     |                               |                     |
| <b>Employed</b>                     | 0.06 (-0.03:0.16)             | Ref                 | 0.11 (0.02:0.21)              | Ref                 | 0.01 (-0.09:0.10)             | Ref                 | -0.02 (-0.11:0.06)            | Ref                 |
| <b>Mixed</b>                        | 0.26 (0.01:0.52)              | 0.20 (-0.07:0.47)   | -0.02 (-0.20:0.17)            | -0.13 (-0.34:0.07)  | 0.25 (-0.03:0.53)             | 0.24 (-0.05:0.54)   | -0.07 (-0.28:0.13)            | -0.05 (-0.27:0.17)  |
| <b>Unemployed</b>                   | 0.25 (-0.08:0.59)             | 0.19 (-0.15:0.54)   | 0.34 (0.03:0.66)              | 0.23 (-0.10:0.56)   | 0.12 (-0.17:0.40)             | 0.11 (-0.19:0.41)   | 0.30 (0.01:0.59)              | 0.32 (0.02:0.63)    |
| <b>Educational level</b>            |                               |                     |                               |                     |                               |                     |                               |                     |
| <b>High</b>                         | 0.10 (-0.02:0.23)             | Ref                 | 0.14 (0.01:0.26)              | Ref                 | 0.01 (-0.12:0.37)             | Ref                 | 0.00 (-0.12:0.11)             | Ref                 |
| <b>Medium</b>                       | 0.12 (-0.01:0.26)             | 0.02 (-0.17:0.20)   | 0.09 (-0.04:0.21)             | -0.05 (-0.23:0.13)  | 0.05 (-0.08:0.18)             | 0.04 (-0.13:0.23)   | 0.00 (-0.12:0.12)             | 0.00 (-0.16:0.20)   |
| <b>Low</b>                          | 0.07 (-0.17:0.32)             | -0.03 (-0.30:0.24)  | 0.12 (-0.09:0.34)             | -0.02 (-0.26:0.23)  | 0.12 (-0.13:0.38)             | 0.11 (-0.16:0.40)   | -0.02 (-0.21:0.16)            | -0.02 (-0.24:0.20)  |
| <b>Income</b>                       |                               |                     |                               |                     |                               |                     |                               |                     |
| <b>High</b>                         | 0.08 (-0.08:0.23)             | Ref                 | 0.16 (0.00:0.33)              | Ref                 | 0.07 (-0.09:0.23)             | Ref                 | 0.00 (-0.15:0.14)             | Ref                 |
| <b>Medium</b>                       | 0.12 (-0.00:0.25)             | 0.04 (-0.16:0.24)   | 0.09 (-0.02:0.21)             | -0.07 (-0.27:0.13)  | 0.00 (-0.12:0.12)             | -0.07 (-0.27:0.13)  | -0.04 (-0.15:0.06)            | -0.04 (-0.22:0.14)  |
| <b>Low</b>                          | 0.11 (-0.06:0.28)             | 0.02 (-0.20:0.26)   | 0.11 (-0.05:0.28)             | -0.05 (-0.28:0.18)  | 0.14 (-0.03:0.32)             | 0.08 (-0.16:0.21)   | 0.07 (-0.09:0.24)             | 0.08 (-0.14:0.29)   |

**Additional consultation rates are defined as the difference between the cancer cohort and the reference cohort.**

**Absolute difference in additional consultation rates compared to the reference group.**

**Statistically significant absolute differences are shown in bold type.**

**Supplementary Table 2. Likelihood (OR) of frequent GP attendance (four or more consultations) among children with specific cancer types**

|                                     | Leukaemia (n=347)       | CNS (n=367)       | Other solid tumors (n= 443) |
|-------------------------------------|-------------------------|-------------------|-----------------------------|
| <b>Parental cohabitation status</b> |                         |                   |                             |
| Living with a partner               | 1.00                    | 1.00              | 1.00                        |
| Living alone                        | 0.84 (0.47:1.49)        | 0.90 (0.50:1.61)  | 0.99 (0.53:1.86)            |
| <b>Siblings</b>                     |                         |                   |                             |
| No                                  | 1.00                    | 1.00              | 1.00                        |
| Yes                                 | 1.43 (0.47:1.49)        | 1.12 (0.59:2.12)  | 1.10 (0.57:2.12)            |
| <b>Labour market affiliation</b>    |                         |                   |                             |
| Employed                            | 1.00                    | 1.00              | 1.00                        |
| Mixed                               | 0.81 (0.39:1.63)        | 0.89 (0.40:2.01)  | 1.68 (0.79:3.52)            |
| Unemployed                          | 1.05 (0.41:2.72)        | 1.21 (0.50:2.94)  | 0.78 (0.24:2.51)            |
| <b>Educational level</b>            |                         |                   |                             |
| High                                | 1.00                    | 1.00              | 1.00                        |
| Medium                              | <b>1.91 (1.09:3.33)</b> | 1.12 (0.64: 1.96) | 0.74 (0.41:1.32)            |
| Low                                 | 1.20 (0.53:2.69)        | 1.13 (0.51:2.49)  | 0.67 (0.28:1.61)            |
| <b>Income</b>                       |                         |                   |                             |
| High                                | 1.00                    | 1.00              | 1.00                        |
| Medium                              | 1.65 (0.90:3.04)        | 1.56 (0.80:3.0)   | 1.94 (0.97:3.88)            |
| Low                                 | 2.23 (0.95:5.26)        | 1.41 (0.57:3.45)  | 1.68 (0.68:4.25)            |

The model is adjusted for age and gender.

Statistically significant estimates are shown in bold type.
